# Supplementary material
Source: Springer Nature journal article supplement (https://www.springermedizin.de/resource/supplementary/12902_2013_253_MOESM1_ESM.pdf/9515874)

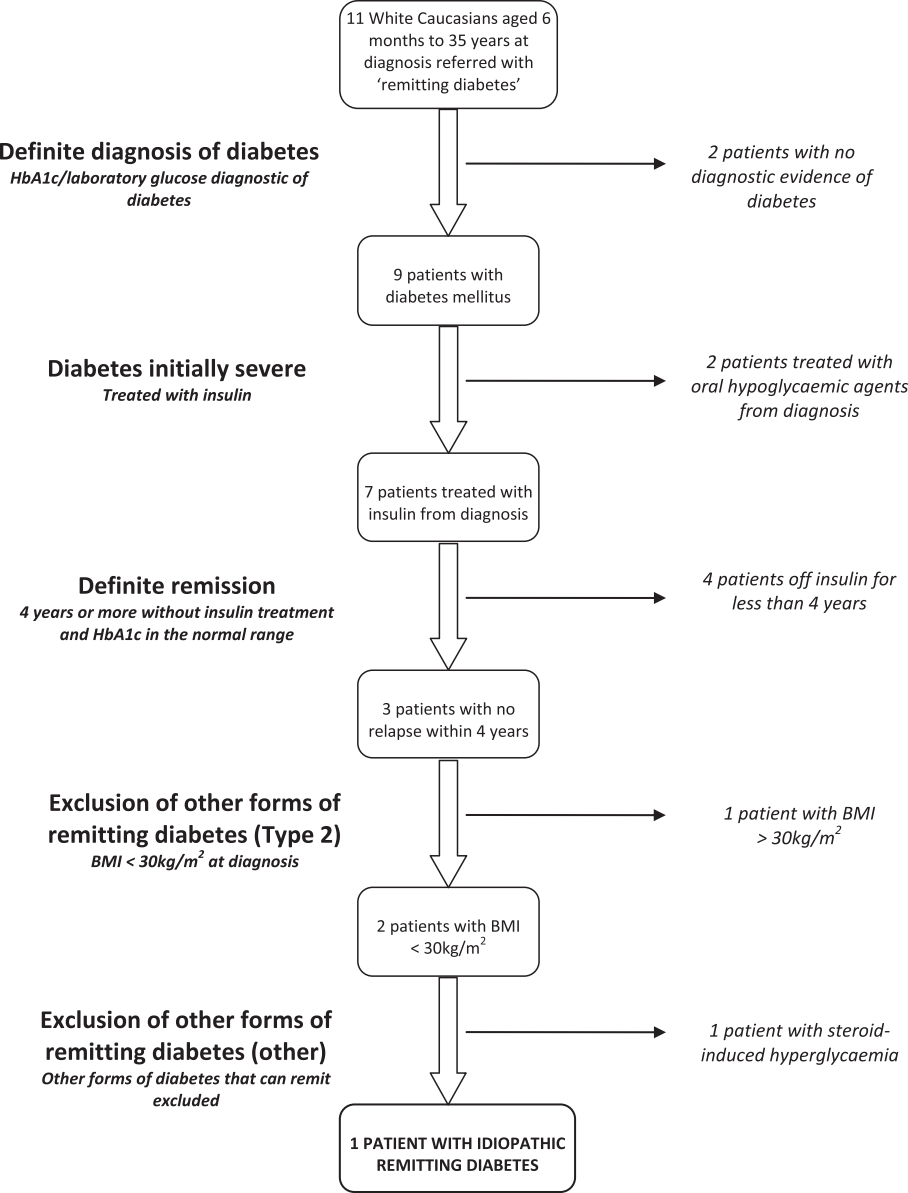

Supplement: MOESM1 [file 9515874]
